# Supplementary material
Source: MDPI journal article supplement (https://www.mdpi.com/1996-1073/12/20/3974)
Supplement: s1 [file s1]

## Supplementary Material

# Catalytic wet air oxidation using supported Pt and Ru catalysts for treatment of distillery wastewater (cognac and sugarcane vinasses)

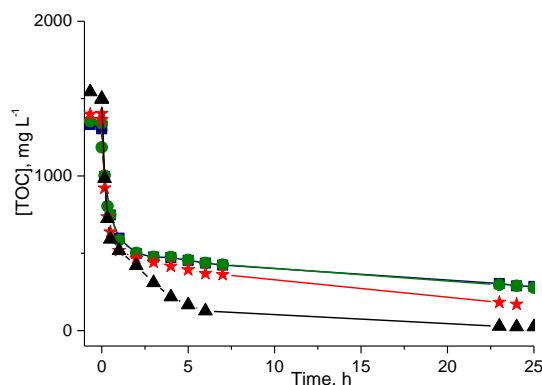

**Figure S1.** Evolution of concentrations of TOC during oxidation of diluted VBC at 190°C under 70 bar in the presence of 500 mg of 3 % Ru/ZrO<sub>2</sub>. 1st reaction (▲,1), 1st recycling (■,2), 2nd recycling (●,3), 3rd recycling after re-activation under H<sub>2</sub> (★,4).

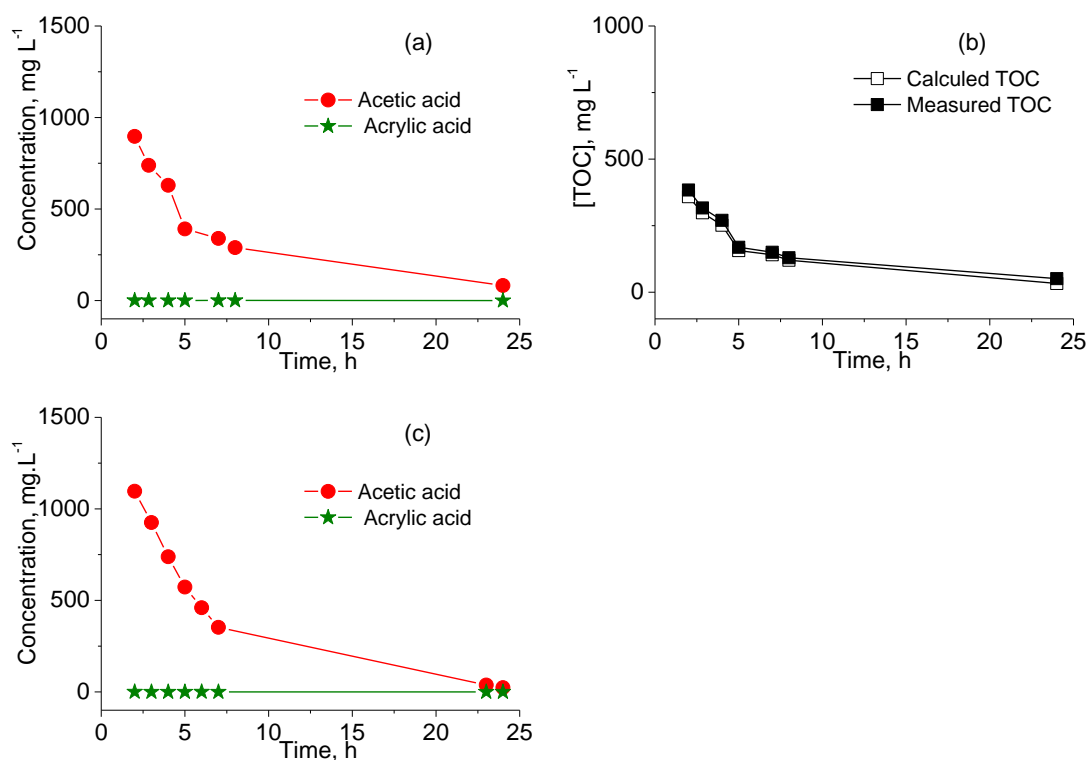

**Figure S2.** CWAO of diluted VBC at 190°C under 70 bar: (a) concentration of (di)carboxylic acids and (b) comparison between TOC measured and (c) TOC calculated over Ru/TiO<sub>2</sub>.

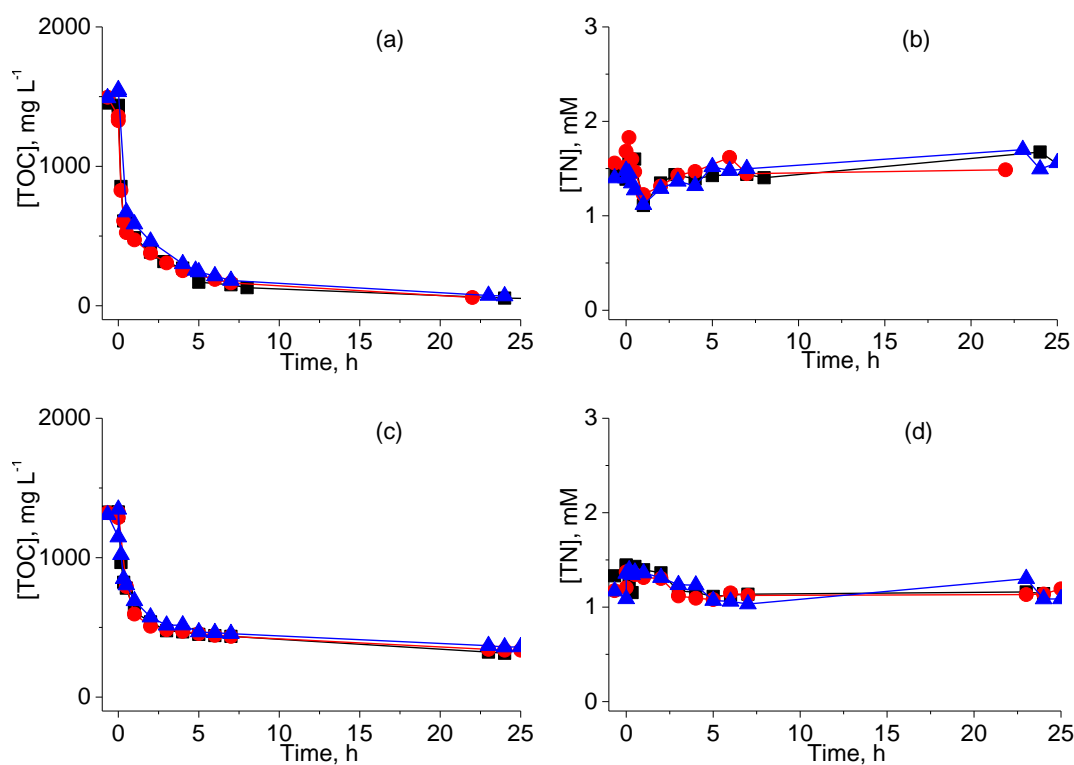

**Figure S3.** Reproducibility in three oxidation reactions over Ru/TiO<sub>2</sub>: (a,c) TOC and (b,d) TN concentrations in the (a,b) initial runs and (c,d) 1st recycling runs.

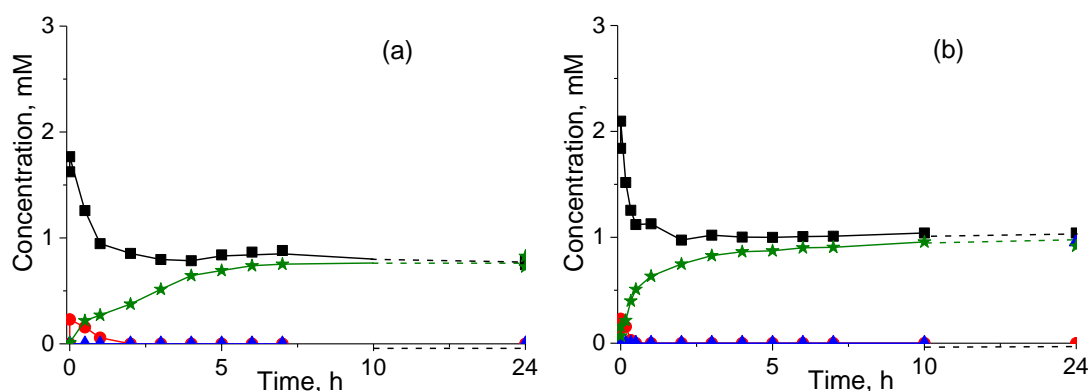

**Figure S4.** Concentrations of the different N-species in the presence of Pt/ZrO<sub>2</sub>: (a) fresh catalyst, (b) used catalyst. TN (■), ammonium (●), nitrite (▲), nitrate (★).

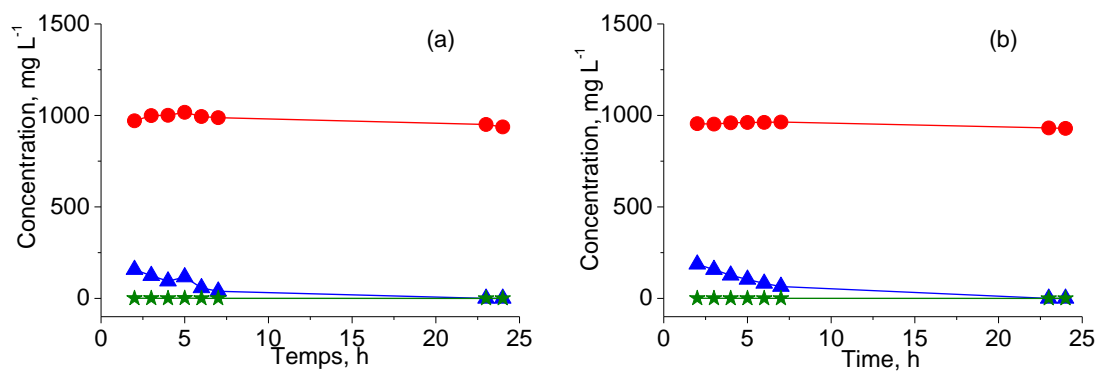

**Figure S5.** Carboxylic (di)acids formed during treatment of diluted VBC over (a) fresh and (b) used Pt/TiO<sub>2</sub>. (●) acetic acid, (▲) succinic acid, (★) acrylic acid.

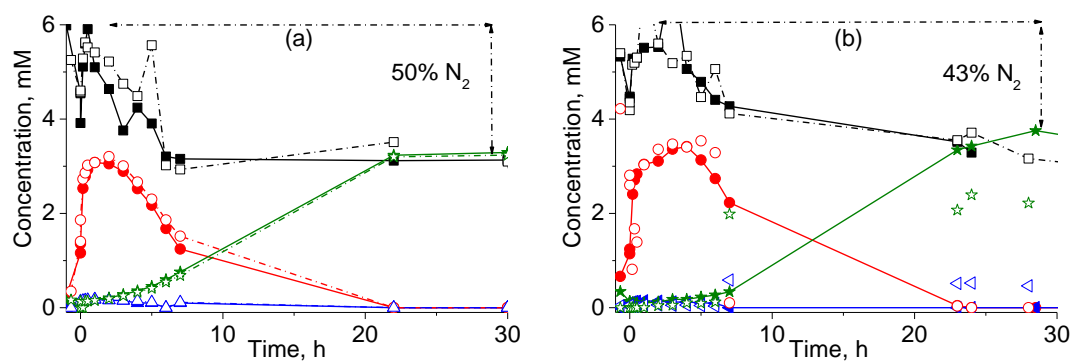

**Figure S6.** Transformation of organic nitrogen in the sugarcane effluent in the presence of (a) Ru/TiO<sub>2</sub> and (b) Ru/ZrO<sub>2</sub>. TN (■), NH<sub>4</sub><sup>+</sup> (●), NO<sub>3</sub><sup>-</sup> (★) and NO<sub>2</sub><sup>-</sup> (▲). Empty symbols show the data for duplicate experiments.
